# Supplementary material
Source: publisher figshare collection journal article supplement (https://sage.figshare.com/ndownloader/files/16214381)
Supplement: Supplementary file 1 [file 16214381]

## Appendix A

**Table A1.** Stationarity tests

| Variable               | Fisher test | LDV coefficient |
|------------------------|-------------|-----------------|
| Consumer confidence    | -3.11*      | .984* (.003)    |
| Egotropic perception   | -1.16       | .983* (.003)    |
| Sociotropic perception | -3.61*      | .979* (.003)    |
| News coverage          | -2.73*      | .845* (.008)    |
| Change in unemployment | -6.31*      | .473* (.013)    |
| Inflation              | -2.97*      | .963* (.004)    |
| GDP                    | -2.56*      | .921* (.006)    |

*Note.* Fisher test with 12 lags (4 for GDP – quarterly data; 1 for inflation – yearly data);

LDV= lagged dependent variable, with standard error in parentheses; \* indicates stationarity

**Table A2.** First-differences models explaining consumer confidence, egotropic and sociotropic economic perceptions

|                                  | <b>Consumer<br/>confidence</b> | <b>Egotropic</b> | <b>Sociotropic</b> |
|----------------------------------|--------------------------------|------------------|--------------------|
| Constant                         | .063 (.054)                    | .037 (.043)      | .068 (.072)        |
| Negative media coverage<br>(t-1) | -.008*** (.002)                | -.005*** (.001)  | -.010*** (.002)    |
| Change in<br>unemployment (t-1)  | -.311 (.230)                   | -.550*** (.184)  | -.742* (.309)      |
| Inflation (t-1)                  | -.004 (.097)                   | .052 (.077)      | -.044 (.130)       |
| GDP (t-1)                        | .033*** (.012)                 | .028*** (.009)   | .048*** (.015)     |
| R <sup>2</sup>                   | .011                           | .036             | .012               |

*Note.*  $n=4308$ , \*  $p < .05$ ; \*\*  $p < .01$ ; \*\*\*  $p < .001$ . Fixed effects are significant in both models, but not displayed.
